# Supplementary material for: Quick Report of the ML=3.3 on 1 January 2023 Guidonia (Rome, Italy) Earthquake: Evidence of a Seismic Acceleration
Source: Preprints.org preprint supplement (doi:10.20944/preprints202301.0067.v1), 2023-01-04
Supplement: Supplementary file 3 [file supplementary]

Communication

Quick report of the ML=3.3 on 1 January 2023 Guidonia (Rome, Italy) earthquake: evidence of a seismic acceleration

Dedalo Marchetti1, Kaiguang Zhu1,*, Laura Marchetti2, Yiqun Zhang1, Wenqi Chen 1, Yuqi Cheng 1, Mengxuan Fan1, Siyu Wang1, Ting Wang 1, Jiami Wen 1, Donghua Zhang 1, Hanshuo Zhang 1.

| **Citation:** Lastname, F.; Lastname, F.; Lastname, F. Title. *Remote Sens.* **2021**, *13*, x. https://doi.org/10.3390/xxxxx  Academic Editor: Firstname Lastname  Received: date  Accepted: date  Published: date  **Publisher’s Note:** MDPI stays neutral with regard to jurisdictional claims in published maps and institutional affiliations.  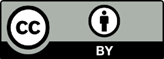  **Copyright:** © 2021 by the authors. Submitted for possible open access publication under the terms and conditions of the Creative Commons Attribution (CC BY) license (https://creativecommons.org/licenses/by/4.0/). |
| --- |

1. College of Instrumentation and Electrical Engineering, Jilin University, Changchun 130061, China;
   dedalomarchetti@jlu.edu.cn (D.M.); zhanghs6518@mails.jlu.edu.cn (H.Z.);
   wqchen21@mails.jlu.edu.cn (W.C.); chengyuqi@jlu.edu.cn (Y.C.); tingwang20@mails.jlu.edu.cn (T.W.); wenjm20@mails.jlu.edu.cn (J.W.); zhangdh6518@mails.jlu.edu.cn (D.Z.); yiqun21@mails.jlu.edu.cn (Y.Z.)
2. Noviconsult SAS, 15060, Basaluzzo (Alessandria), Italy; laura.marchetti@noviconsult.it (L.M.)

***** Correspondence: zhukaiguang@jlu.edu.cn;

Supplementary Materials


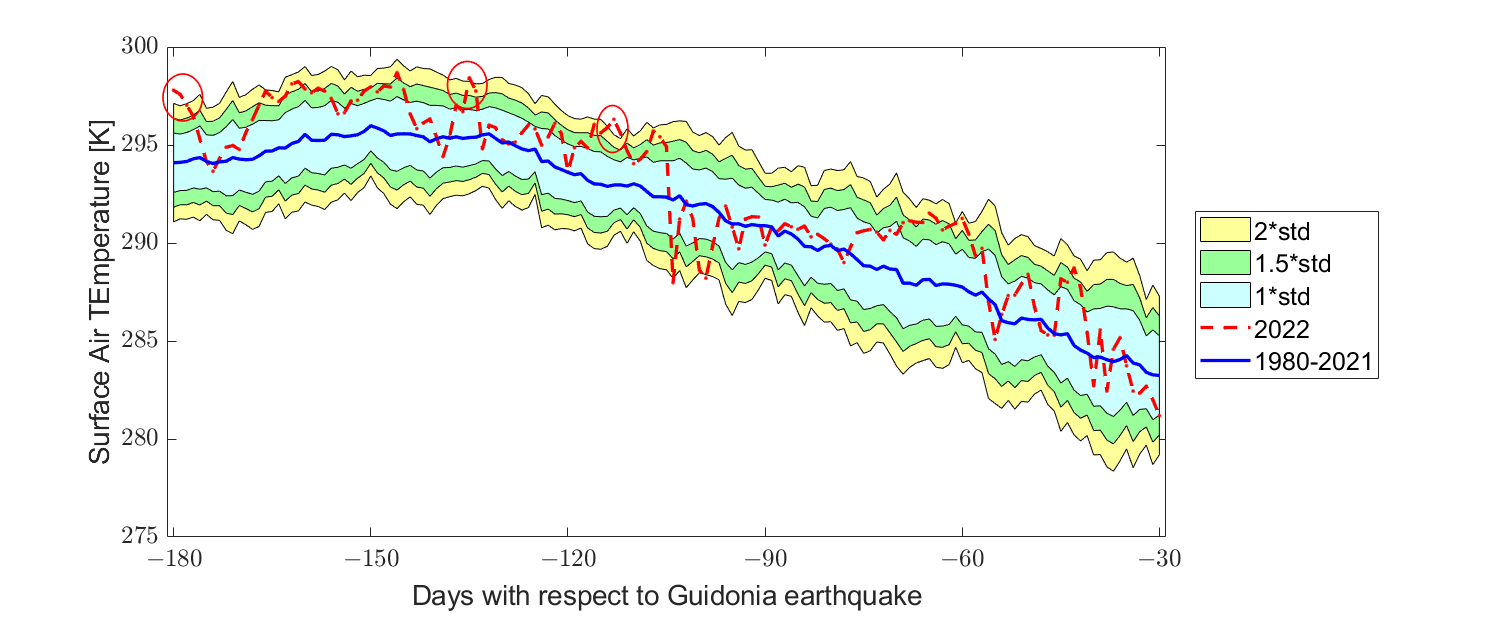


**Figure S1.** Surface air temperature time series from 3 July 2022 (six months before the ML=3.3 1 January 2023 Guidonia earthquake) until 30 November 2022.


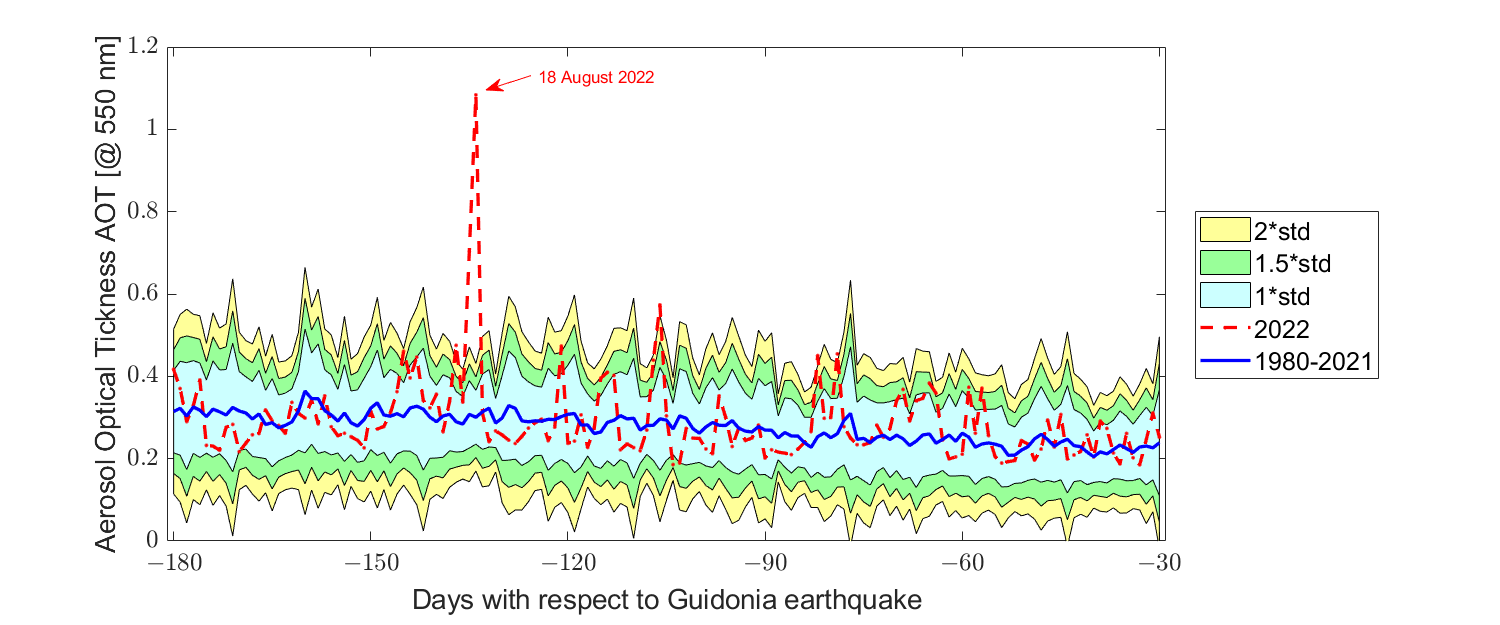


**Figure S2.** Aerosol time series from 3 July 2022 (six months before the ML=3.3 1 January 2023 Guidonia earthquake) until 30 November 2022.


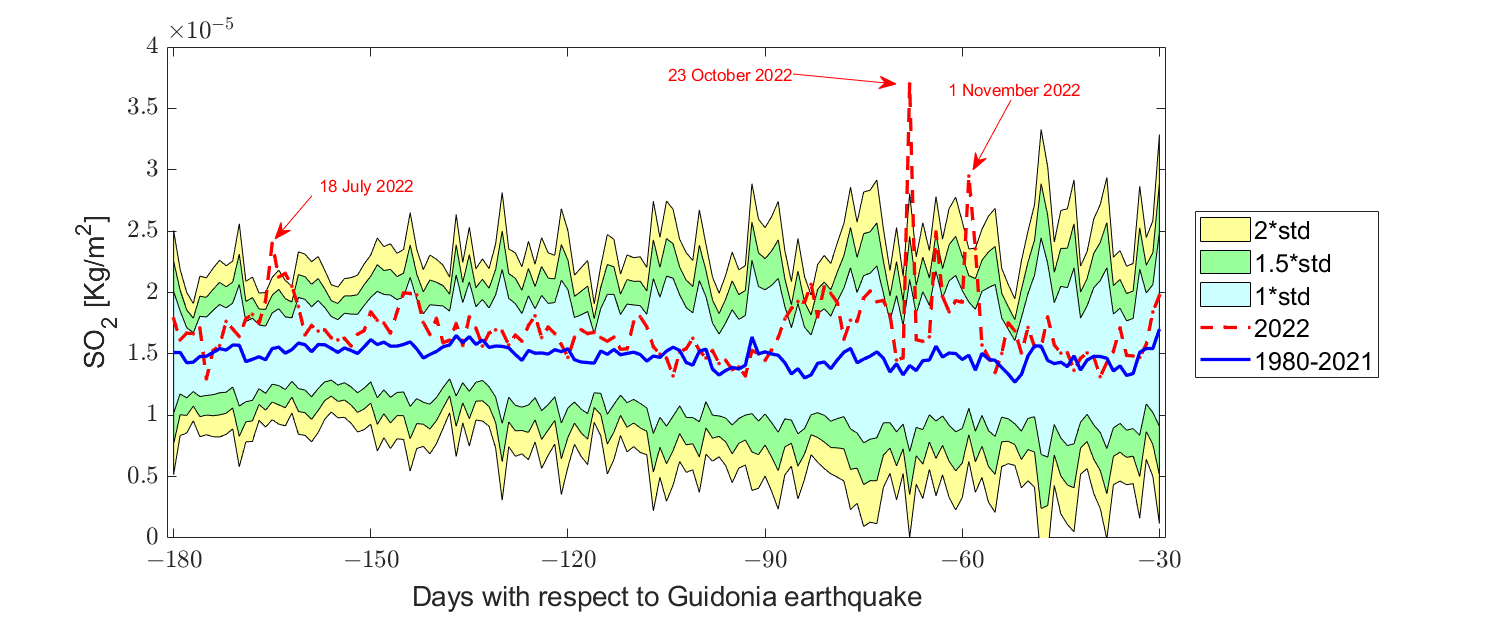


**Figure S3.** SO2 time series from 3 July 2022 (six months before the ML=3.3 1 January 2023 Guidonia earthquake) until 30 November 2022. The years of 1989 and 1993 have been excluded automatically as particularly anomalous.


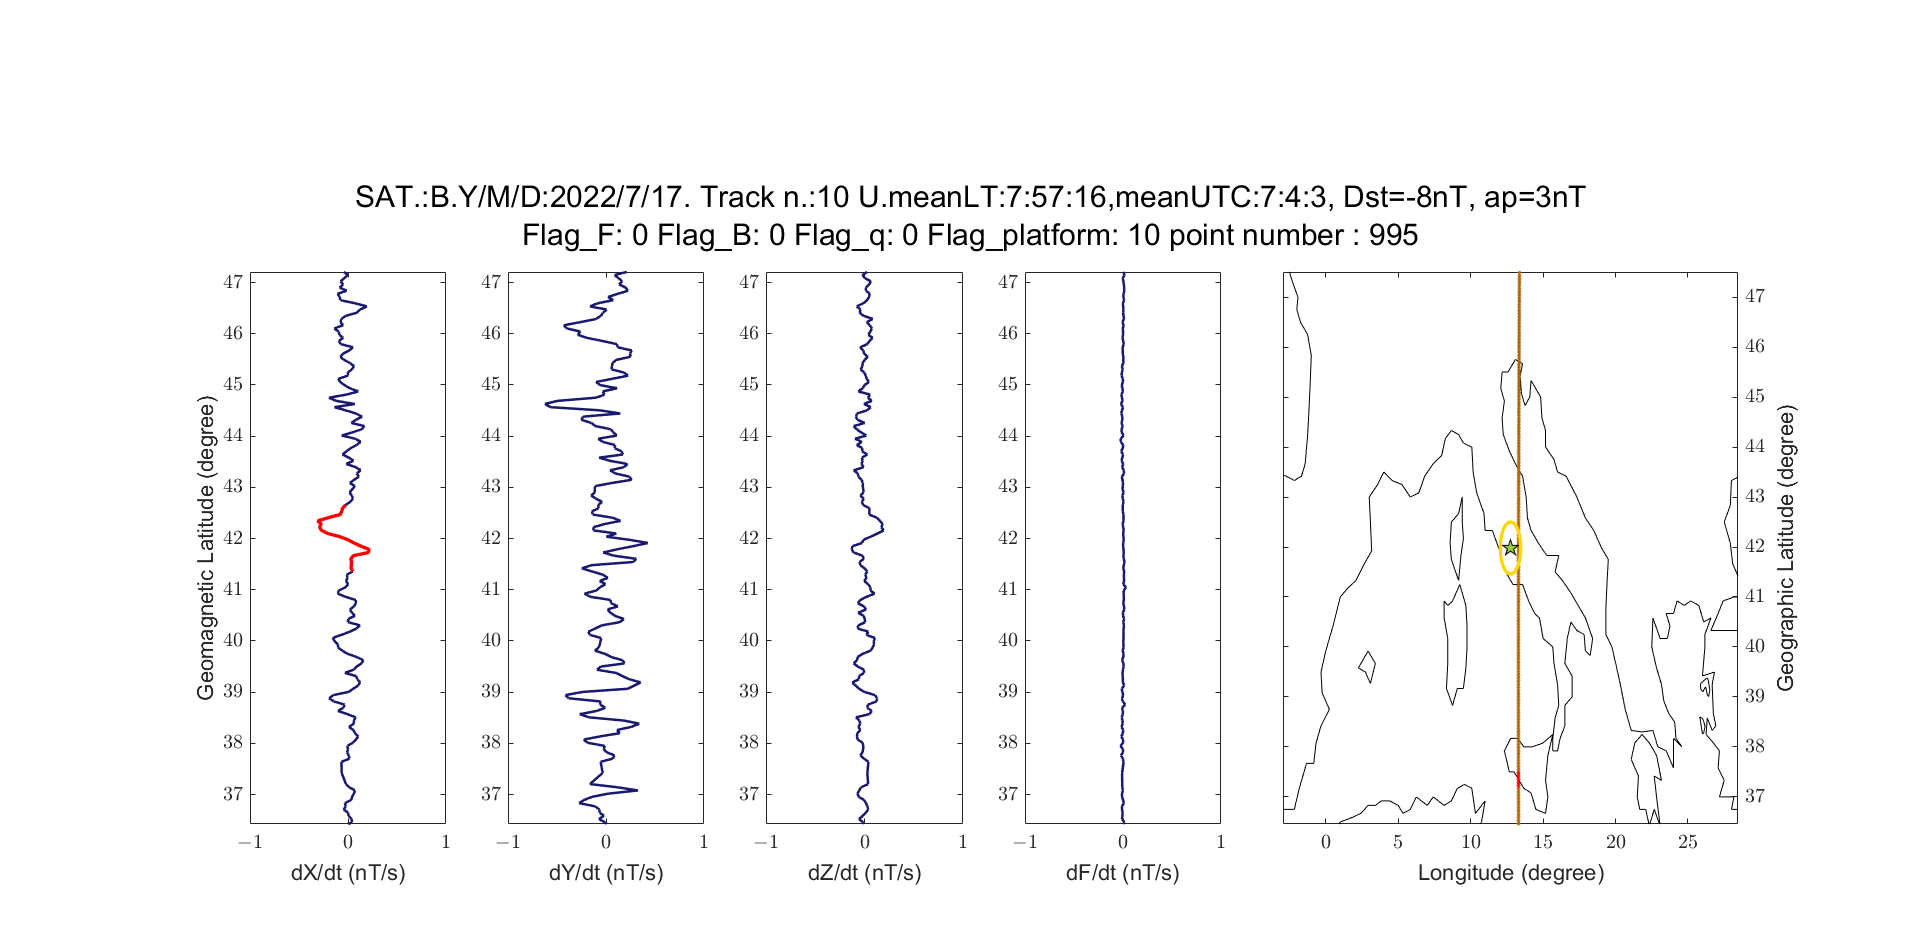


**Figure S4.** Swarm Bravo magnetic field analysis on 17 July 2022, track 10.


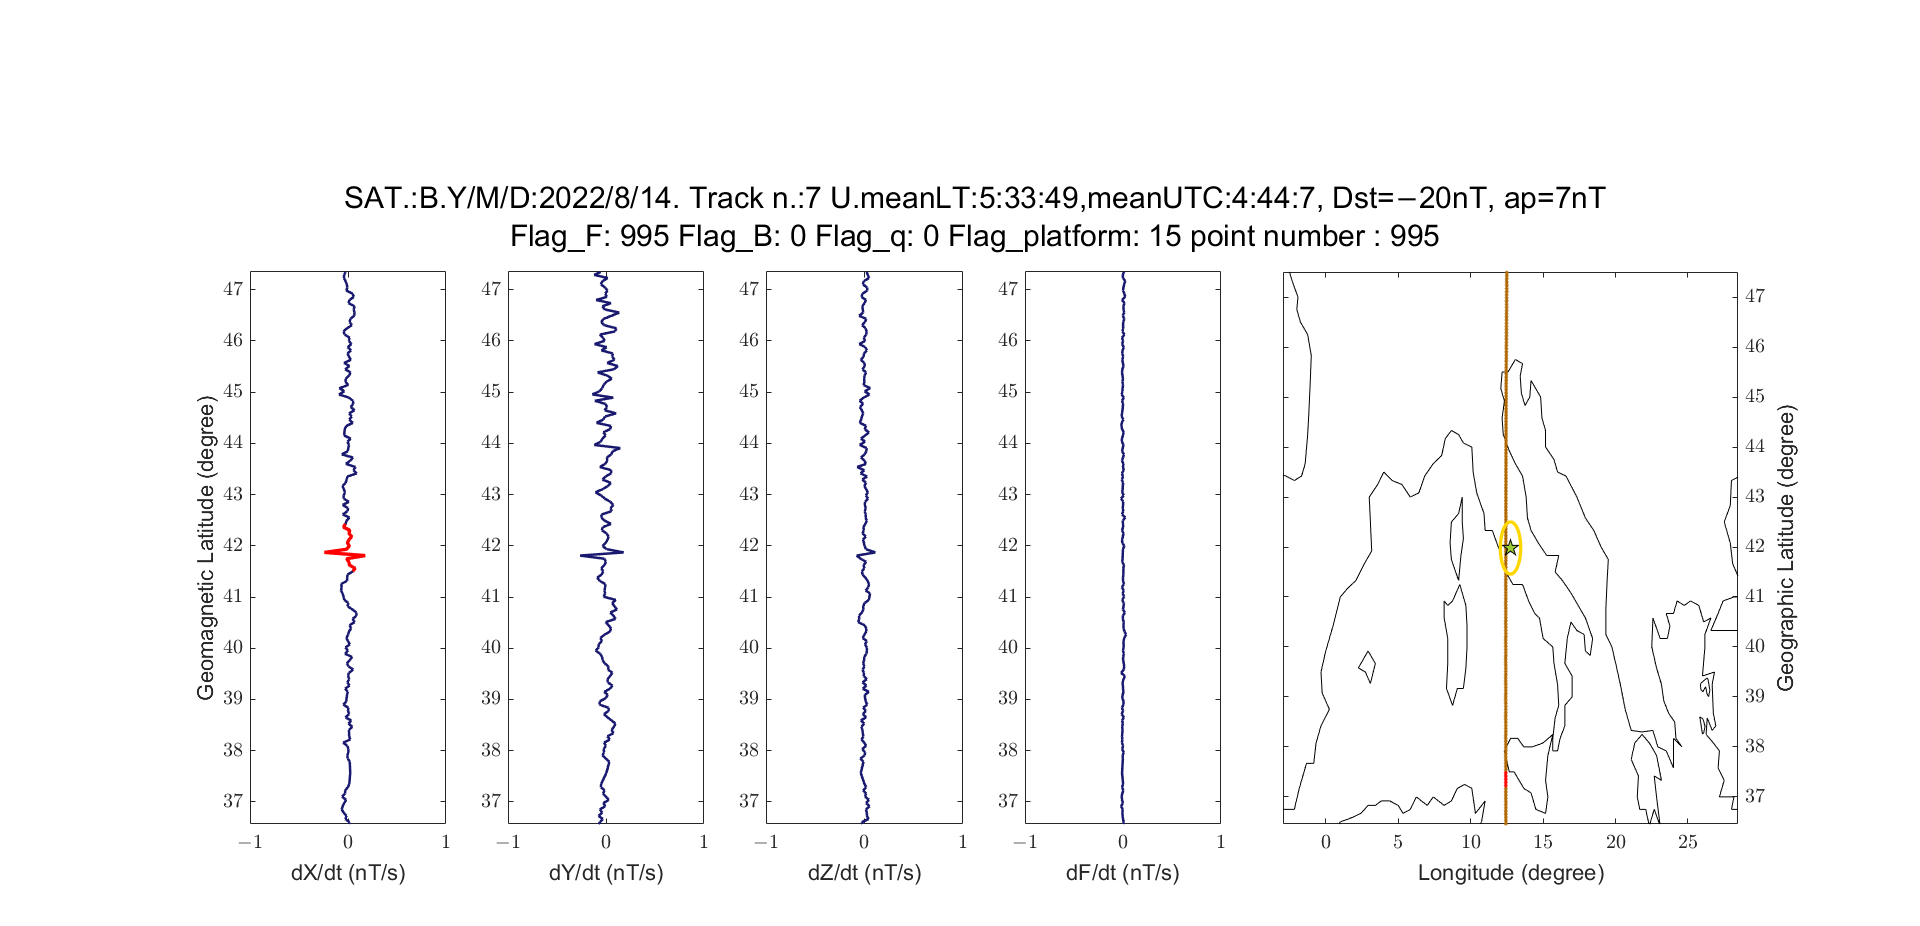


**Figure S5.** Swarm Bravo magnetic field analysis on 14 August 2022, track 7.
